# Supplementary material for: CRTC1 mediates preferential transcription at neuronal activity-regulated CRE/TATA promoters
Source: PubMed Central journal article supplement (PMC5740062; doi:10.1038/s41598-017-18215-y), 2017-12-21

**CRTC1 mediates preferential transcription at neuronal activity-regulated  
CRE/TATA promoters**

Arnaldo Parra-Damas, Laura Rubió-Ferrarons, Jie Shen and Carlos A. Saura

**Supplementary Table 1.** Consensus CRE sites in the promoter regions of CREB target genes in *H. Sapiens*

| Symbol       | Gene Name                                            | Accession | Chrom | Strand | Position  | CRE Sites                                                              | Total CRE sites | Proximal CRE (-500b to 300b) | Distal CRE (-3Kb to -500b) | Proximal CRE TATA |
|--------------|------------------------------------------------------|-----------|-------|--------|-----------|------------------------------------------------------------------------|-----------------|------------------------------|----------------------------|-------------------|
| <i>FOS</i>   | v-fos FBJ murine osteosarcoma viral oncogene homolog | NM_005252 | chr14 | +      | 73735571  | HT_-343<br>HT_-296<br>HT_-63<br>H_190                                  | 4               | 4                            | 0                          | 3                 |
| <i>DUSP1</i> | dual specificity phosphatase 1                       | NM_004417 | chr5  | -      | 172179126 | h_97<br>ht_-102<br>FT_-113<br>HT_-163<br>ht_-1239                      | 5               | 4                            | 1                          | 3                 |
| <i>NR4A1</i> | nuclear receptor subfamily 4, group A, member 1      | NM_002135 | chr12 | +      | 50731457  | ht_-1234<br>ht_-683<br>HT_-197<br>HT_-177<br>HT_-34<br>HT_-5           | 6               | 4                            | 2                          | 4                 |
| <i>NR4A2</i> | nuclear receptor subfamily 4, group A, member 2      | NM_006186 | chr2  | -      | 157391745 | HT_-71<br>HT_-81<br>FT_-163<br>h_-493<br>H_-1936<br>H_-2033<br>H_-2053 | 7               | 4                            | 3                          | 3                 |
| <i>PSEN1</i> | presenilin 1 Transcript variant 1                    | NM_000021 | chr14 | +      | 71593219  | h_-166<br>h_-32                                                        | 2               | 2                            | 0                          | 0                 |
| <i>PSEN1</i> | presenilin 1 Transcript variant 2                    | NM_007318 | chr14 | +      | 71593565  | h_-512<br>h_-378                                                       | 2               | 1                            | 1                          | 0                 |
| <i>PSEN2</i> | presenilin 2 (isoform 1)                             | NM_000447 | chr1  | +      | 224033590 | -                                                                      | 0               | -                            | -                          | -                 |
| <i>PSEN2</i> | presenilin 2 (isoform 2)                             | NM_012486 | chr1  | +      | 224033590 | -                                                                      | 0               | -                            | -                          | -                 |
| <i>PTGS2</i> | prostaglandin-endoperoxide synthase 2                | NM_000963 | chr1  | -      | 183888548 | h_29<br>ht_-53<br>ht_-564                                              | 3               | 2                            | 1                          | 1                 |

Promoter elements according to the CREB Target Gene database (<http://natural.salk.edu/CREB>)<sup>18</sup>. Number of CRE sites in gene promoters classified according to the distance to the transcription starting site as follows: total, proximal (-500 bp to 300 bp), distal (-3Kbp to -500bp) and proximal CRE/TATA (with TATA boxes < 300bp). The position of each CRE relative to the TSS is indicated following the underlined dash."FT\_": conserved full CRE site (TGACGTCA/TGACGTCA) containing a downstream TATA box at less than 300 bp; "H\_" or "HT\_" mean a half CRE site (TGACG/CGTCA) conserved between species without (H) or with (HT) a TATA box less than 300 bp, respectively; "h\_" or "ht\_" mean a non-conserved half CRE site (TGACG/CGTCA) without (h) or with (ht) a TATA box less than 300 bp, respectively.

## Original scans of Western blots

### Figure 2

**Figure 2A left panel:** two different exposures of the same membrane are shown

**pCRTC1 (upper band detected mainly in Vehicle treated neurons) and dephospho-CRTC1 (prominent lower band detected mainly at 1-8h):**

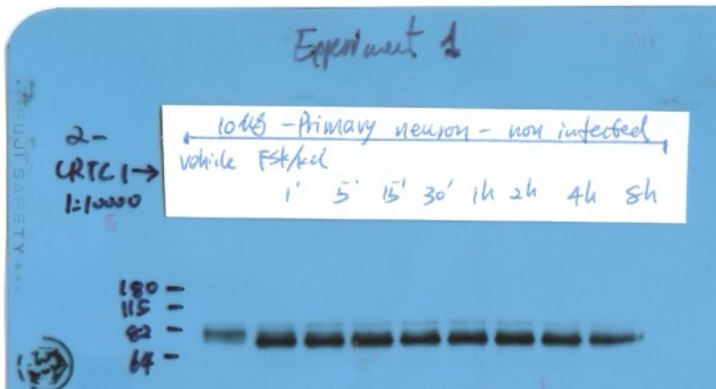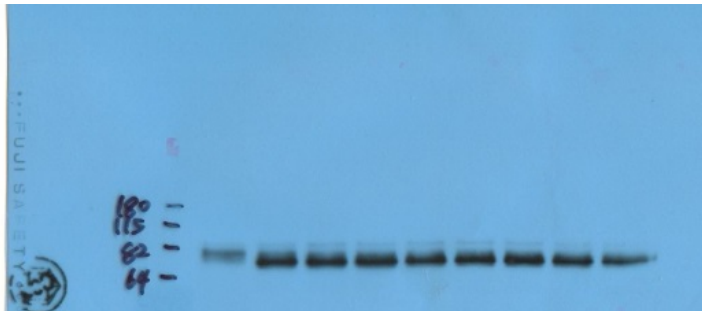

**GAPDH:**

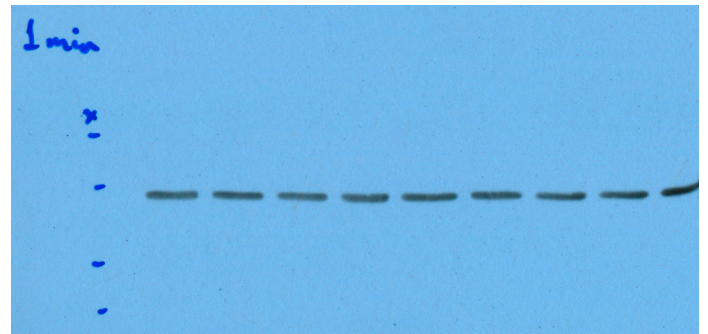

**Figure 2A right panel:**

**pCREB (Ser133):** Two different exposures are shown

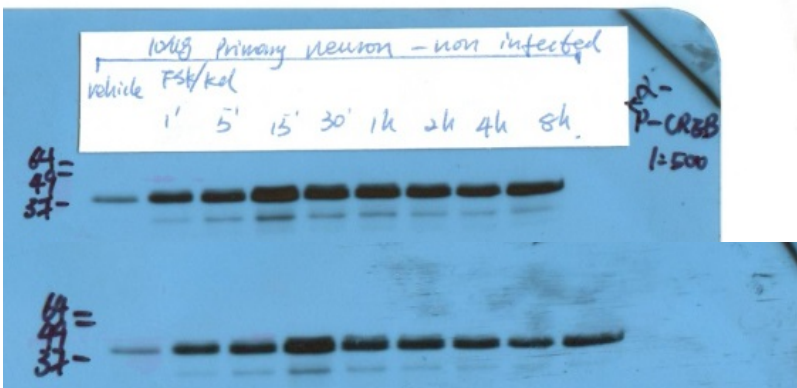

**CREB:**

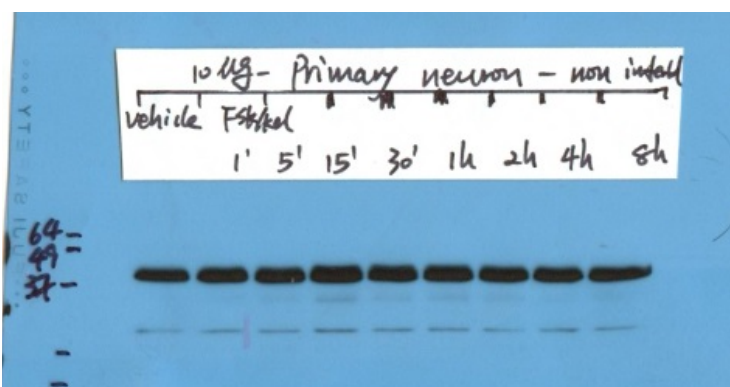

**GAPDH:**

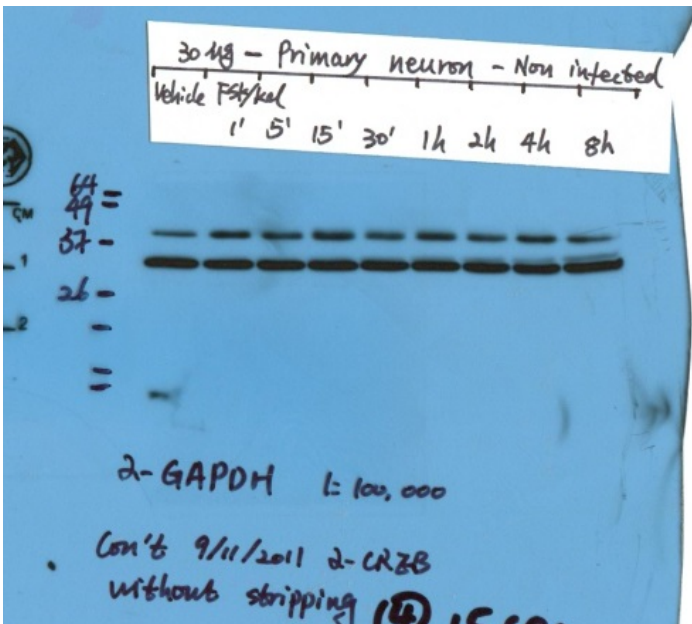

**Figure 2D**

**CRTC1:**

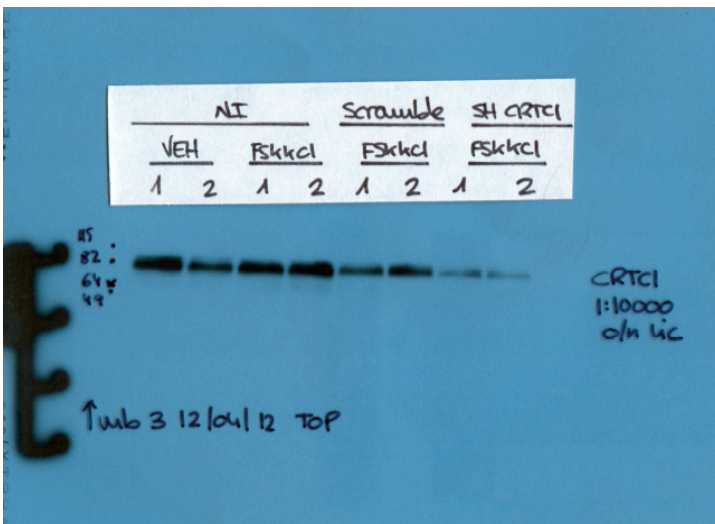

**GAPDH:**

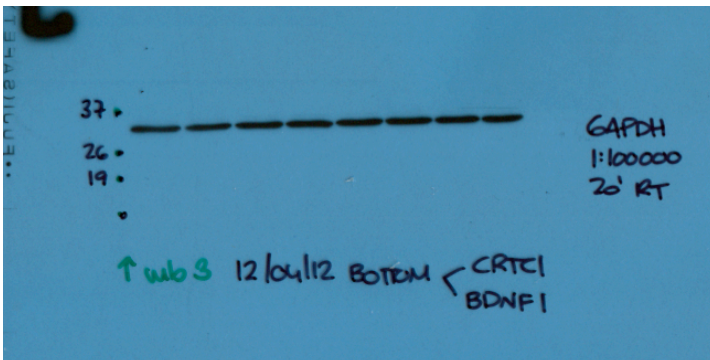

**Figure 5**

**Figure 5A: Primary cortical neurons**

CREB (Upper band):

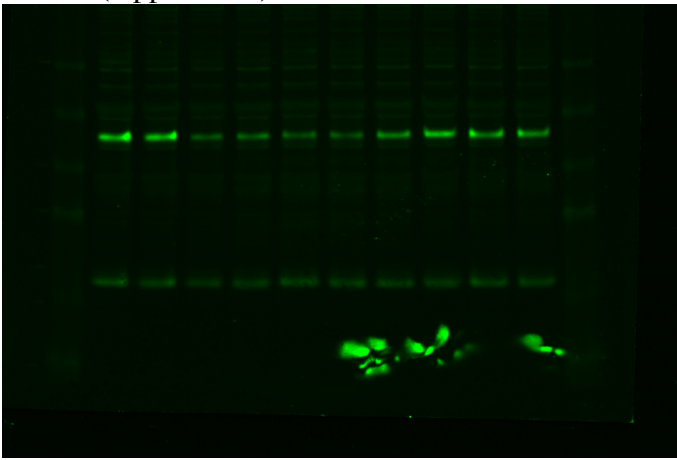

$\beta$ -tubulin:

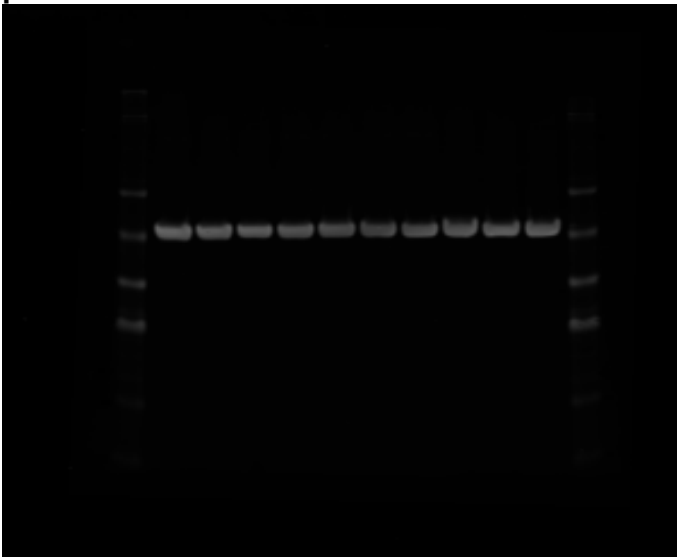

**Figure 5C: HEK293 cells**

Sequential blotting of the same membrane with the following antibodies:

CREB:

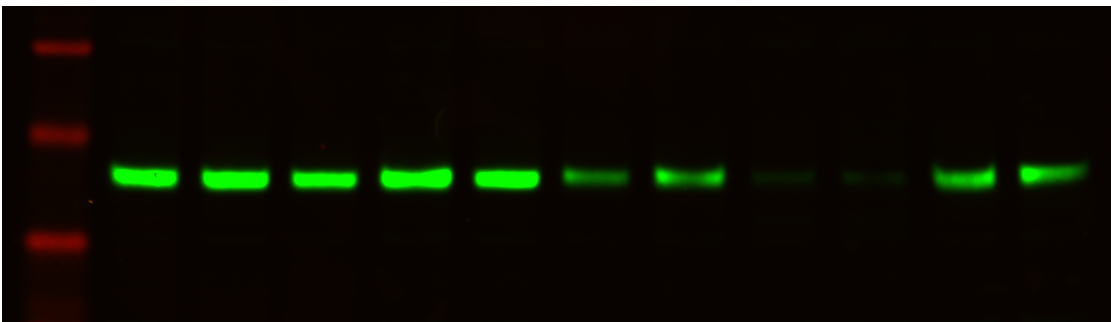

**NURR1** (upper prominent band):

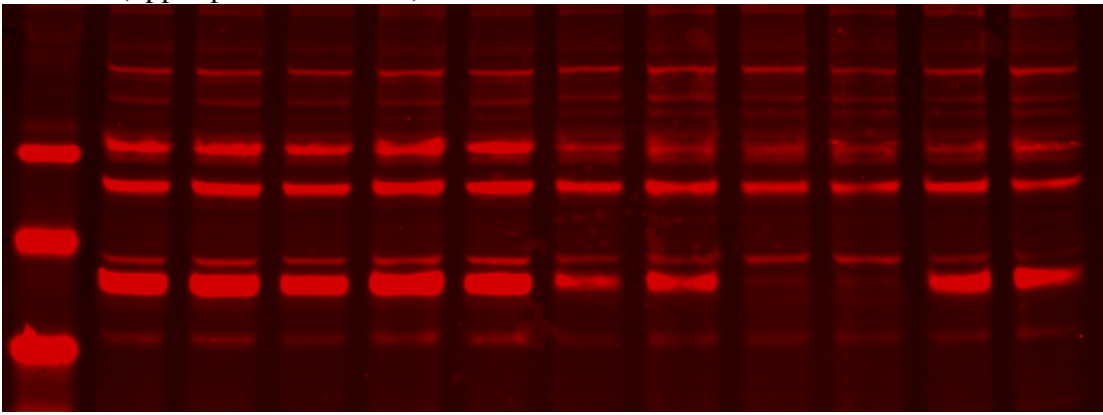

**PS1 CTF** (bottom band):

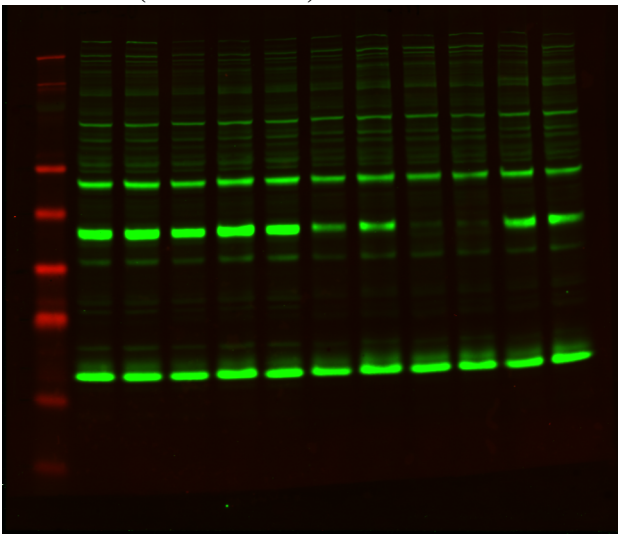

**Figure 5D:**

Same membrane than Figure 5A.

**PS1 CTF** (PS1 loop antibody; lower band)

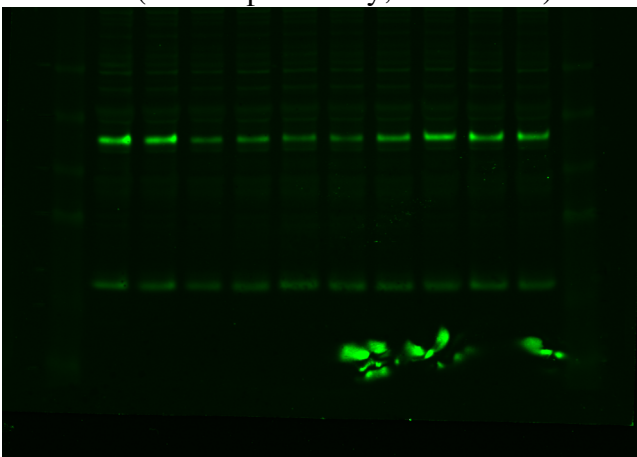

$\beta$ -tubulin:

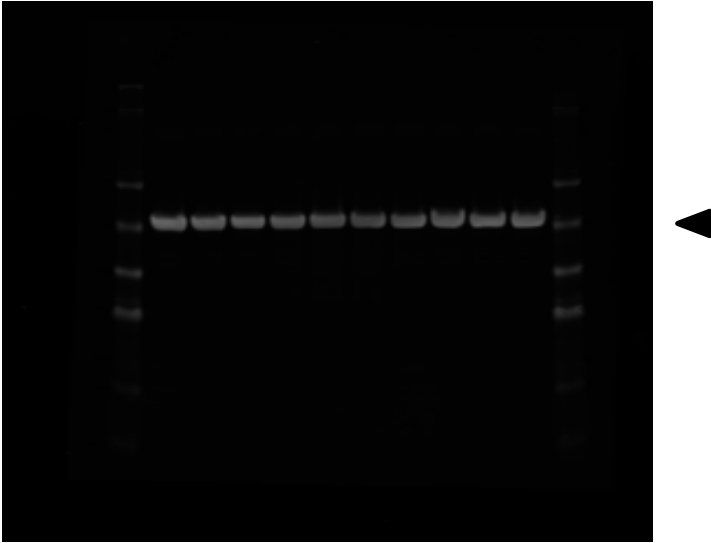

Figure 6

Figure 6A:

pCRTC1/CRTC1 : top (long exposure) and middle (short exposure) membranes and phosphorylated Ser133 CREB (pCREB; bottom membrane)

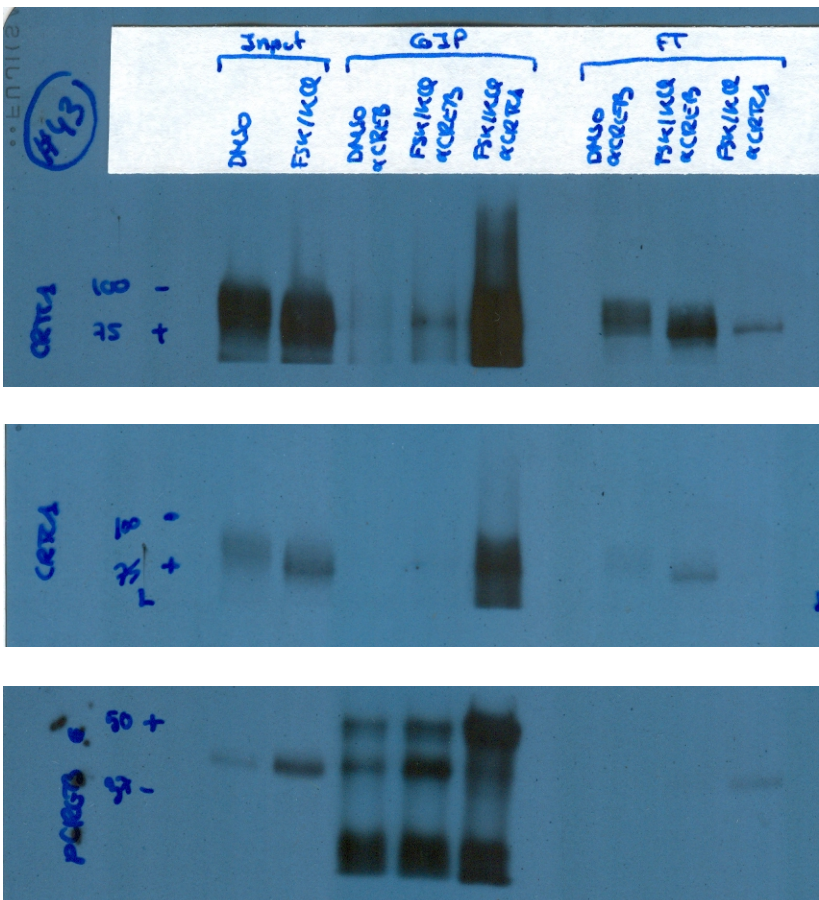

Supplement: 41598_2017_18215_MOESM1_ESM.pdf [file 41598_2017_18215_MOESM1_ESM.pdf]
